# Supplementary material
Source: PubMed Central journal article supplement (PMC5875735)
Supplement: supp_kwv146_kwv146supp.pdf [file supp_kwv146_kwv146supp.pdf]

**Web Table 1.** Association (HR (95% CI)) of Daily Coffee Intake with Overall and Cause-Specific Mortality, by Sex, in the PLCO Cancer Screening Trial, 1998–2009

|                           | Daily Coffee Consumption |                      |                     |                         |                        |                       | P Value* |
|---------------------------|--------------------------|----------------------|---------------------|-------------------------|------------------------|-----------------------|----------|
|                           | None<br>(n = 5,857)      | <1 Cup<br>(n = 6501) | 1 Cup<br>(n = 5703) | 2–3 Cups<br>(n = 16230) | 4–5 Cups<br>(n = 5465) | ≥6 Cups<br>(n = 2013) |          |
| <i>Men (n = 41,769)</i>   |                          |                      |                     |                         |                        |                       |          |
| No. of deaths             | 754                      | 857                  | 769                 | 1,933                   | 682                    | 299                   |          |
| Model 1 <sup>a</sup>      | 1.00                     | 1.04 (0.94, 1.14)    | 0.98 (0.89, 1.09)   | 0.94 (0.86, 1.14)       | 1.07 (0.96, 1.18)      | 1.41 (1.23, 1.61)     | <0.001   |
| Model 2 <sup>b</sup>      | 1.00                     | 0.94 (0.85, 1.04)    | 0.87 (0.78, 0.96)   | 0.75 (0.69, 0.82)       | 0.74 (0.66, 0.82)      | 0.79 (0.68, 0.90)     | <0.0001  |
| Model 3 <sup>c</sup>      | 1.00                     | 0.99 (0.89, 1.09)    | 0.95 (0.86, 1.06)   | 0.83 (0.76, 0.91)       | 0.80 (0.72, 0.90)      | 0.85 (0.74, 0.98)     | <0.0001  |
| <i>Women (n = 48,548)</i> |                          |                      |                     |                         |                        |                       |          |
| No. of deaths             | 622                      | 595                  | 603                 | 1,174                   | 316                    | 114                   |          |
| Model 1 <sup>a</sup>      | 1.00                     | 1.03 (0.92, 1.15)    | 0.93 (0.83, 1.04)   | 0.89 (0.81, 0.98)       | 1.02 (0.89, 1.17)      | 1.44 (1.18, 1.76)     | 0.17     |
| Model 2 <sup>b</sup>      | 1.00                     | 0.97 (0.87, 1.09)    | 0.86 (0.77, 0.96)   | 0.74 (0.67, 0.81)       | 0.70 (0.61, 0.81)      | 0.80 (0.65, 0.98)     | <0.0001  |
| Model 3 <sup>c</sup>      | 1.00                     | 1.02 (0.91, 1.14)    | 0.93 (0.83, 1.05)   | 0.82 (0.74, 0.91)       | 0.77 (0.67, 0.89)      | 0.85 (0.69, 1.05)     | <0.0001  |

Abbreviations: CI, confidence interval; HR, hazard ratio; MHT, menopausal hormone therapy; PLCO, Prostate, Lung, Colorectal, and Ovarian.

\* P value for trend test; statistical tests were 2-sided, and  $P < 0.05$  was interpreted as statistically significant.

<sup>a</sup> Age-adjusted.

<sup>b</sup> Additionally adjusted for detailed smoking history (number of cigarettes smoked per day ( $\leq 10$ , 11–20, 21–40,  $\geq 41$ ), time of smoking cessation ( $>1$  and  $<5$ , 5– $<10$ , 10– $<20$ , or  $\geq 20$  years prior to study entry; individuals who quit within 1 year of baseline were considered current smokers), age at smoking initiation ( $<15$ , 15– $<20$ , 20– $<25$ , or  $\geq 25$  years), use of pipes or cigars (never, former, or current user)).

<sup>c</sup> Additionally adjusted for age, race or ethnic group (non-Hispanic white, non-Hispanic black, Hispanic, or other), education level (less than a high school education, high school graduate or equivalent, some post-high school education, or college graduate), marital status (married or living as married or not married), employment status (working or homemaker, unemployed, retired, extended sick leave or disabled, or other), presence or absence of diabetes, body mass index ( $<18.5$ , 18.5– $<25$ , 25– $<30$ , 30– $<35$ , or  $\geq 35$  kg/m<sup>2</sup>), any supplemental vitamin use in the previous 12 months (yes or no), regular ibuprofen use in the previous 12 months (yes or no), regular aspirin use in the previous 12 months (yes or no), MHT use (women only) (never, former, or current user), alcohol use (none,  $<1$ , 1– $<3$ , or  $\geq 3$  drinks/day), total daily energy intake, and quintile of intake of daily red and processed meat, white meat (i.e., poultry and fish), saturated fat, fruits, and vegetables.

**Web Table 2.** Association (HR (95% CI)) of Daily Coffee Intake with Overall and Cause-Specific Mortality, Including Participants with a History of Cancer, Coronary Heart Disease, Heart Attack, and Stroke, in the PLCO Cancer Screening Trial, 1998–2009 (N = 110,266)

| Cause of Death                            | Daily Coffee Consumption |                        |                       |                          |                          |                        | P Value* |
|-------------------------------------------|--------------------------|------------------------|-----------------------|--------------------------|--------------------------|------------------------|----------|
|                                           | None<br>(n = 17,613)     | <1 Cup<br>(n = 18,013) | 1 Cup<br>(n = 17,079) | 2–3 Cups<br>(n = 41,620) | 4–5 Cups<br>(n = 11,967) | ≥6 Cups<br>(n = 3,974) |          |
| <b>All causes</b>                         |                          |                        |                       |                          |                          |                        |          |
| No. of deaths                             | 2,107                    | 2,279                  | 2,169                 | 4,811                    | 1,452                    | 606                    |          |
| Model 1 <sup>a</sup>                      | 1.00                     | 1.04 (0.98, 1.10)      | 0.98 (0.92, 1.04)     | 0.92 (0.88, 0.97)        | 1.00 (0.94, 1.07)        | 1.34 (1.23, 1.47)      | <0.01    |
| Model 2 <sup>b</sup>                      | 1.00                     | 1.00 (0.94, 1.06)      | 0.95 (0.89, 1.01)     | 0.83 (0.78, 0.87)        | 0.76 (0.71, 0.81)        | 0.81 (0.73, 0.89)      | <0.0001  |
| <b>Heart disease</b>                      |                          |                        |                       |                          |                          |                        |          |
| No. of deaths                             | 483                      | 575                    | 479                   | 1,075                    | 313                      | 118                    |          |
| Model 1 <sup>a</sup>                      | 1.00                     | 1.12 (1.00, 1.27)      | 0.93 (0.82, 1.06)     | 0.88 (0.79, 0.98)        | 0.92 (0.79, 1.06)        | 1.09 (0.89, 1.34)      | 0.07     |
| Model 2 <sup>b</sup>                      | 1.00                     | 1.08 (0.95, 1.22)      | 0.92 (0.81, 1.05)     | 0.83 (0.74, 0.93)        | 0.75 (0.65, 0.87)        | 0.73 (0.59, 0.91)      | <0.0001  |
| <b>Cancer</b>                             |                          |                        |                       |                          |                          |                        |          |
| No. of deaths                             | 709                      | 742                    | 786                   | 1,883                    | 613                      | 275                    |          |
| Model 1 <sup>a</sup>                      | 1.00                     | 1.01 (0.91, 1.12)      | 1.07 (0.97, 1.19)     | 1.08 (0.99, 1.18)        | 1.26 (1.13, 1.40)        | 1.78 (1.55, 2.05)      | <0.0001  |
| Model 2 <sup>b, c</sup>                   | 1.00                     | 0.96 (0.87, 1.07)      | 1.01 (0.91, 1.13)     | 0.92 (0.84, 1.01)        | 0.89 (0.79, 0.99)        | 1.00 (0.86, 1.16)      | 0.22     |
| <b>Chronic lower respiratory diseases</b> |                          |                        |                       |                          |                          |                        |          |
| No. of deaths                             | 63                       | 96                     | 82                    | 257                      | 101                      | 47                     |          |
| Model 1 <sup>a</sup>                      | 1.00                     | 1.46 (1.06, 2.01)      | 1.21 (0.87, 1.68)     | 1.67 (1.26, 2.19)        | 2.42 (1.76, 3.31)        | 3.69 (2.53, 5.39)      | <0.0001  |
| Model 2 <sup>b</sup>                      | 1.00                     | 1.17 (0.84, 1.61)      | 0.96 (0.68, 1.34)     | 0.89 (0.67, 1.19)        | 0.76 (0.55, 1.06)        | 0.73 (0.49, 1.07)      | <0.01    |
| <b>Stroke</b>                             |                          |                        |                       |                          |                          |                        |          |
| No. of deaths                             | 120                      | 117                    | 124                   | 214                      | 58                       | 37                     |          |
| Model 1 <sup>a</sup>                      | 1.00                     | 0.95 (0.73, 1.22)      | 0.95 (0.74, 1.22)     | 0.75 (0.60, 0.93)        | 0.77 (0.56, 1.06)        | 1.67 (1.15, 2.41)      | 0.07     |
| Model 2 <sup>b</sup>                      | 1.00                     | 0.88 (0.68, 1.14)      | 0.89 (0.69, 1.16)     | 0.66 (0.52, 0.84)        | 0.61 (0.44, 0.85)        | 1.13 (0.76, 1.67)      | 0.16     |
| <b>Accidents</b>                          |                          |                        |                       |                          |                          |                        |          |
| No. of deaths                             | 85                       | 67                     | 71                    | 166                      | 42                       | 25                     |          |
| Model 1 <sup>a</sup>                      | 1.00                     | 0.75 (0.55, 1.04)      | 0.80 (0.58, 1.09)     | 0.78 (0.60, 1.02)        | 0.70 (0.49, 1.02)        | 1.32 (0.85, 2.07)      | 0.64     |
| Model 2 <sup>b</sup>                      | 1.00                     | 0.77 (0.55, 1.07)      | 0.82 (0.59, 1.14)     | 0.76 (0.57, 1.01)        | 0.62 (0.42, 0.92)        | 1.05 (0.66, 1.69)      | 0.58     |
| <b>Alzheimer's disease</b>                |                          |                        |                       |                          |                          |                        |          |
| No. of deaths                             | 24                       | 24                     | 17                    | 42                       | 10                       | 3                      |          |
| Model 1 <sup>a</sup>                      | 1.00                     | 0.96 (0.54, 1.68)      | 0.64 (0.34, 1.18)     | 0.72 (0.44, 1.19)        | 0.67 (0.32, 1.39)        | 0.69 (0.21, 2.29)      | 0.23     |
| Model 2 <sup>b</sup>                      | 1.00                     | 1.06 (0.59, 1.92)      | 0.71 (0.37, 1.37)     | 0.79 (0.45, 1.37)        | 0.68 (0.31, 1.48)        | 0.53 (0.15, 1.86)      | 0.15     |

[Continued]

|                                   |      |                   |                   |                   |                   |                   |         |
|-----------------------------------|------|-------------------|-------------------|-------------------|-------------------|-------------------|---------|
| <b>Diabetes</b>                   |      |                   |                   |                   |                   |                   |         |
| No. of deaths                     | 68   | 73                | 48                | 79                | 25                | 11                |         |
| Model 1 <sup>a</sup>              | 1.00 | 1.02 (0.73, 1.42) | 0.68 (0.47, 0.98) | 0.46 (0.33, 0.64) | 0.51 (0.33, 0.81) | 0.71 (0.37, 1.34) | <0.0001 |
| Model 2 <sup>b, d</sup>           | 1.00 | 1.09 (0.77, 1.54) | 0.78 (0.53, 1.14) | 0.52 (0.37, 0.73) | 0.51 (0.31, 0.83) | 0.58 (0.30, 1.13) | <0.001  |
| <b>Kidney disease<sup>e</sup></b> |      |                   |                   |                   |                   |                   |         |
| No. of deaths                     | 30   | 38                | 47                | 61                | 10                | 2                 |         |
| Model 1 <sup>a</sup>              | 1.00 | 1.20 (0.74, 1.94) | 1.43 (0.90, 2.26) | 0.82 (0.53, 1.28) | 0.51 (0.25, 1.03) | 0.34 (0.08, 1.40) | <0.001  |
| Model 2 <sup>b</sup>              | 1.00 | 1.27 (0.77, 2.07) | 1.59 (0.99, 2.56) | 0.87 (0.54, 1.39) | 0.46 (0.22, 0.97) | 0.24 (0.06, 1.04) | <0.001  |
| <b>Influenza and pneumonia</b>    |      |                   |                   |                   |                   |                   |         |
| No. of deaths                     | 61   | 48                | 59                | 115               | 27                | 12                |         |
| Model 1 <sup>a</sup>              | 1.00 | 0.75 (0.51, 1.09) | 0.89 (0.63, 1.28) | 0.76 (0.56, 1.03) | 0.65 (0.42, 1.03) | 0.95 (0.51, 1.76) | 0.35    |
| Model 2 <sup>b</sup>              | 1.00 | 0.73 (0.49, 1.07) | 0.88 (0.61, 1.29) | 0.70 (0.50, 0.98) | 0.50 (0.31, 0.81) | 0.60 (0.31, 1.14) | 0.02    |
| <b>Intentional self-harm</b>      |      |                   |                   |                   |                   |                   |         |
| No. of deaths                     | 11   | 15                | 18                | 24                | 7                 | 3                 |         |
| Model 1 <sup>a</sup>              | 1.00 | 1.28 (0.59, 2.78) | 1.65 (0.78, 3.49) | 0.83 (0.41, 1.70) | 0.79 (0.31, 2.04) | 0.99 (0.27, 3.54) | 0.23    |
| Model 2 <sup>b</sup>              | 1.00 | 0.97 (0.44, 2.15) | 1.27 (0.58, 2.75) | 0.56 (0.27, 1.20) | 0.47 (0.17, 1.26) | 0.52 (0.14, 1.95) | 0.03    |
| <b>Other causes</b>               |      |                   |                   |                   |                   |                   |         |
| No. of deaths                     | 453  | 484               | 438               | 895               | 246               | 73                |         |
| Model 1 <sup>a</sup>              | 1.00 | 1.02 (0.90, 1.16) | 0.91 (0.79, 1.03) | 0.80 (0.72, 0.90) | 0.81 (0.69, 0.94) | 0.78 (0.61, 1.00) | <0.0001 |
| Model 2 <sup>b</sup>              | 1.00 | 1.03 (0.91, 1.18) | 0.94 (0.82, 1.08) | 0.79 (0.70, 0.90) | 0.71 (0.60, 0.84) | 0.57 (0.44, 0.74) | <0.0001 |

**Web Table 3.** Association (HR (95% CI)) of Daily Coffee Intake with Overall and Cause-Specific Mortality Among Participants with Information on Physical Activity in the PLCO Cancer Screening Trial, 1998–2009 ( $N = 42,235$ )

| Cause of Death                            | Daily Coffee Consumption |                       |                      |                          |                       | P Value* |
|-------------------------------------------|--------------------------|-----------------------|----------------------|--------------------------|-----------------------|----------|
|                                           | None<br>(n = 6,707)      | <1 Cup<br>(n = 6,846) | 1 Cup<br>(n = 6,420) | 2–3 Cups<br>(n = 16,125) | ≥4Cups<br>(n = 6,137) |          |
| <b>All causes</b>                         |                          |                       |                      |                          |                       |          |
| No. of deaths                             | 613                      | 619                   | 594                  | 1,401                    | 621                   |          |
| Fully adjusted <sup>a</sup>               | 1.00                     | 0.93 (0.83, 1.05)     | 0.92 (0.82, 1.03)    | 0.81 (0.73, 0.90)        | 0.77 (0.68, 0.87)     | <0.0001  |
| + physical activity <sup>b</sup>          | 1.00                     | 0.93 (0.83, 1.05)     | 0.92 (0.81, 1.03)    | 0.81 (0.73, 0.90)        | 0.77 (0.68, 0.87)     | <0.0001  |
| <b>Heart disease</b>                      |                          |                       |                      |                          |                       |          |
| No. of deaths                             | 129                      | 142                   | 116                  | 269                      | 123                   |          |
| Fully adjusted <sup>a</sup>               | 1.00                     | 1.03 (0.80, 1.32)     | 0.88 (0.67, 1.14)    | 0.82 (0.65, 1.03)        | 0.86 (0.66, 1.12)     | 0.10     |
| + physical activity <sup>b</sup>          | 1.00                     | 1.03 (0.81, 1.32)     | 0.87 (0.67, 1.14)    | 0.82 (0.65, 1.03)        | 0.86 (0.65, 1.12)     | 0.07     |
| <b>Cancer</b>                             |                          |                       |                      |                          |                       |          |
| No. of deaths                             | 189                      | 191                   | 216                  | 572                      | 262                   |          |
| Fully adjusted <sup>a,c</sup>             | 1.00                     | 0.91 (0.74, 1.12)     | 1.05 (0.86, 1.29)    | 0.99 (0.83, 1.18)        | 0.91 (0.75, 1.12)     | 0.52     |
| + physical activity <sup>b</sup>          | 1.00                     | 0.91 (0.74, 1.12)     | 1.05 (0.86, 1.29)    | 0.99 (0.83, 1.18)        | 0.91 (0.75, 1.12)     | 0.57     |
| <b>Chronic lower respiratory diseases</b> |                          |                       |                      |                          |                       |          |
| No. of deaths                             | 19                       | 26                    | 19                   | 80                       | 43                    |          |
| Fully adjusted <sup>a</sup>               | 1.00                     | 0.93 (0.50, 1.71)     | 0.72 (0.37, 1.39)    | 0.84 (0.49, 1.42)        | 0.64 (0.36, 1.13)     | 0.10     |
| + physical activity <sup>b</sup>          | 1.00                     | 0.94 (0.51, 1.74)     | 0.71 (0.37, 1.37)    | 0.85 (0.50, 1.45)        | 0.65 (0.36, 1.15)     | 0.13     |
| <b>Stroke</b>                             |                          |                       |                      |                          |                       |          |
| No. of deaths                             | 41                       | 34                    | 34                   | 67                       | 24                    |          |
| Fully adjusted <sup>a</sup>               | 1.00                     | 0.74 (0.46, 1.18)     | 0.70 (0.43, 1.12)    | 0.56 (0.37, 0.86)        | 0.50 (0.29, 0.86)     | 0.01     |
| + physical activity <sup>b</sup>          | 1.00                     | 0.74 (0.46, 1.18)     | 0.69 (0.43, 1.12)    | 0.56 (0.37, 0.85)        | 0.50 (0.29, 0.87)     | 0.01     |
| <b>Accidents</b>                          |                          |                       |                      |                          |                       |          |
| No. of deaths                             | 26                       | 24                    | 22                   | 46                       | 21                    |          |
| Fully adjusted <sup>a</sup>               | 1.00                     | 0.81 (0.45, 1.45)     | 0.77 (0.43, 1.40)    | 0.61 (0.36, 1.03)        | 0.62 (0.33, 1.16)     | 0.12     |
| + physical activity <sup>b</sup>          | 1.00                     | 0.82 (0.46, 1.46)     | 0.79 (0.43, 1.43)    | 0.61 (0.36, 1.04)        | 0.62 (0.33, 1.16)     | 0.10     |
| <b>Alzheimer's disease</b>                |                          |                       |                      |                          |                       |          |
| No. of deaths                             | 7                        | 11                    | 7                    | 11                       | 4                     |          |
| Fully adjusted <sup>a</sup>               | 1.00                     | 1.57 (0.58, 4.31)     | 1.05 (0.35, 3.22)    | 0.64 (0.23, 1.82)        | 0.64 (0.17, 2.49)     | 0.10     |
| + physical activity <sup>b</sup>          | 1.00                     | 1.62 (0.59, 4.43)     | 1.07 (0.35, 3.28)    | 0.63 (0.22, 1.80)        | 0.65 (0.17, 2.54)     | 0.08     |

[Continued]

|                                  |      |                   |                   |                   |                   |       |
|----------------------------------|------|-------------------|-------------------|-------------------|-------------------|-------|
| Diabetes                         |      |                   |                   |                   |                   |       |
| No. of deaths                    | 11   | 17                | 16                | 16                | 9                 |       |
| Fully adjusted <sup>a, d</sup>   | 1.00 | 1.80 (0.81, 4.00) | 2.11 (0.93, 4.76) | 0.82 (0.36, 1.86) | 1.06 (0.41, 2.75) | 0.17  |
| + physical activity <sup>b</sup> | 1.00 | 1.77 (0.80, 3.94) | 2.11 (0.93, 4.77) | 0.81 (0.36, 1.86) | 1.05 (0.41, 2.72) | 0.15  |
| Kidney disease <sup>c</sup>      |      |                   |                   |                   |                   |       |
| No. of deaths                    | 9    | 11                | 11                | 12                | 4                 |       |
| Fully adjusted <sup>a</sup>      | 1.00 | 1.17 (0.46, 2.95) | 1.19 (0.46, 3.04) | 0.59 (0.23, 1.52) | 0.52 (0.15, 1.81) | 0.07  |
| + physical activity <sup>b</sup> | 1.00 | 1.17 (0.46, 2.96) | 1.21 (0.47, 3.12) | 0.61 (0.24, 1.56) | 0.52 (0.15, 1.81) | 0.07  |
| Influenza and pneumonia          |      |                   |                   |                   |                   |       |
| No. of deaths                    | 21   | 19                | 18                | 32                | 12                |       |
| Fully adjusted <sup>a</sup>      | 1.00 | 0.91 (0.48, 1.75) | 0.87 (0.45, 1.70) | 0.61 (0.34, 1.12) | 0.51 (0.24, 1.11) | 0.04  |
| + physical activity <sup>b</sup> | 1.00 | 0.92 (0.48, 1.76) | 0.87 (0.45, 1.71) | 0.62 (0.34, 1.13) | 0.52 (0.24, 1.11) | 0.04  |
| Intentional self-harm            |      |                   |                   |                   |                   |       |
| No. of deaths                    | 4    | 8                 | 6                 | 7                 | 4                 |       |
| Fully adjusted <sup>a</sup>      | 1.00 | 1.48 (0.42, 5.19) | 1.21 (0.32, 4.56) | 0.45 (0.12, 1.67) | 0.57 (0.13, 2.50) | 0.07  |
| + physical activity <sup>b</sup> | 1.00 | 1.47 (0.42, 5.18) | 1.21 (0.32, 4.57) | 0.46 (0.12, 1.68) | 0.56 (0.13, 2.45) | 0.05  |
| Other causes                     |      |                   |                   |                   |                   |       |
| No. of deaths                    | 157  | 136               | 129               | 289               | 115               |       |
| Fully adjusted <sup>a</sup>      | 1.00 | 0.86 (0.68, 1.09) | 0.83 (0.65, 1.06) | 0.74 (0.59, 0.91) | 0.69 (0.53, 0.90) | <0.01 |
| + physical activity <sup>b</sup> | 1.00 | 0.86 (0.67, 1.09) | 0.83 (0.65, 1.05) | 0.73 (0.59, 0.91) | 0.69 (0.53, 0.89) | <0.01 |

Abbreviations: CI, confidence interval; HR, hazard ratio; MHT, menopausal hormone therapy; PLCO, Prostate, Lung, Colorectal, and Ovarian. \**P* value for trend test; statistical tests were 2-sided, and *P* < 0.05 was interpreted as statistically significant.

<sup>a</sup> Adjusted for age, sex, detailed smoking history (number of cigarettes smoked per day ( $\leq 10$ , 11–20, 21–40,  $\geq 41$ ), time of smoking cessation ( $> 1$  and  $< 5$ , 5– $< 10$ , 10– $< 20$ , or  $\geq 20$  years prior to study entry; individuals who quit within 1 year of baseline were considered current smokers), age at smoking initiation ( $< 15$ , 15– $< 20$ , 20– $< 25$ , or  $\geq 25$  years), use of pipes or cigars (never, former, or current user)), race or ethnic group (non-Hispanic white, non-Hispanic black, Hispanic, or other), education level (less than a high school education, high school graduate or equivalent, some post-high school education, or college graduate), marital status (married or living as married or not married), employment status (working or homemaker, unemployed, retired, extended sick leave or disabled, or other), presence or absence of diabetes, body mass index ( $< 18.5$ , 18.5– $< 25$ , 25– $< 30$ , 30– $< 35$ , or  $\geq 35$  kg/m<sup>2</sup>), any supplemental vitamin use in the previous 12 months (yes or no), regular ibuprofen use in the previous 12 months (yes or no), regular aspirin use in the previous 12 months (yes or no), MHT use (women only) (never, former, or current user), alcohol use (none,  $< 1$ , 1– $< 3$ , or  $\geq 3$  drinks/day), total daily energy intake, and quintile of intake of daily red and processed meat, white meat (e.g., poultry and fish), saturated fat, fruits, and vegetables.

<sup>b</sup> Additionally adjusted for hours per week engaged in vigorous physical activity (none,  $< 1$ , 1, 2, 3,  $\geq 4$ ).

<sup>c</sup> Additionally adjusted for a history of cancer (other than nonmelanoma skin cancer) in a first-degree relative (yes or no).

<sup>d</sup> Not adjusted for presence or absence of self-reported diabetes.

<sup>e</sup> Nephritis, nephrotic syndrome and nephrosis.
